# Supplementary material
Source: PubMed Central journal article supplement (PMC6323552)
Supplement: mmc1.pdf [file mmc1.pdf]

## Supplemental Data

### **GGC Repeat Expansion and Exon 1 Methylation of *XYLT1* Is a Common Pathogenic Variant in Baratela-Scott Syndrome**

**Amy J. LaCroix, Deborah Stabley, Rebecca Sahraoui, Margaret P. Adam, Michele Mehaffey, Kelly Kernan, Candace T. Myers, Carrie Fagerstrom, George Anadiotis, Yasmine M. Akkari, Katherine M. Robbins, Karen W. Gripp, Wagner A.R. Baratela, Michael B. Bober, Angela L. Duker, Dan Doherty, Jennifer C. Dempsey, Daniel G. Miller, Martin Kircher, Michael J. Bamshad, Deborah A. Nickerson, University of Washington Center for Mendelian Genomics, Heather C. Mefford, and Katia Sol-Church**

**Figure S1**

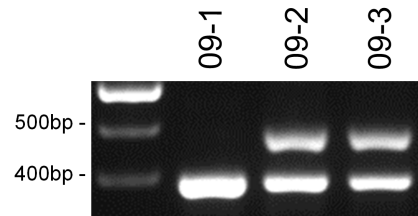

**Figure S1: Splice variant deletes *XYLT1* exon 6 in Family 09.** RT-PCR of WBC cDNA from Family 09. The proband 09-1 is homozygous for the splice site variant c.1290-1G>A, while each parent (09-2 and 09-3) is heterozygous. Primers spanning from exon 5 to exon 7 of *XYLT1* show a smaller product in addition to the 470bp wild-type product. Sanger sequencing (not shown) confirms that the variant causes exon 6 (81bp) to be skipped.

**Figure S2**

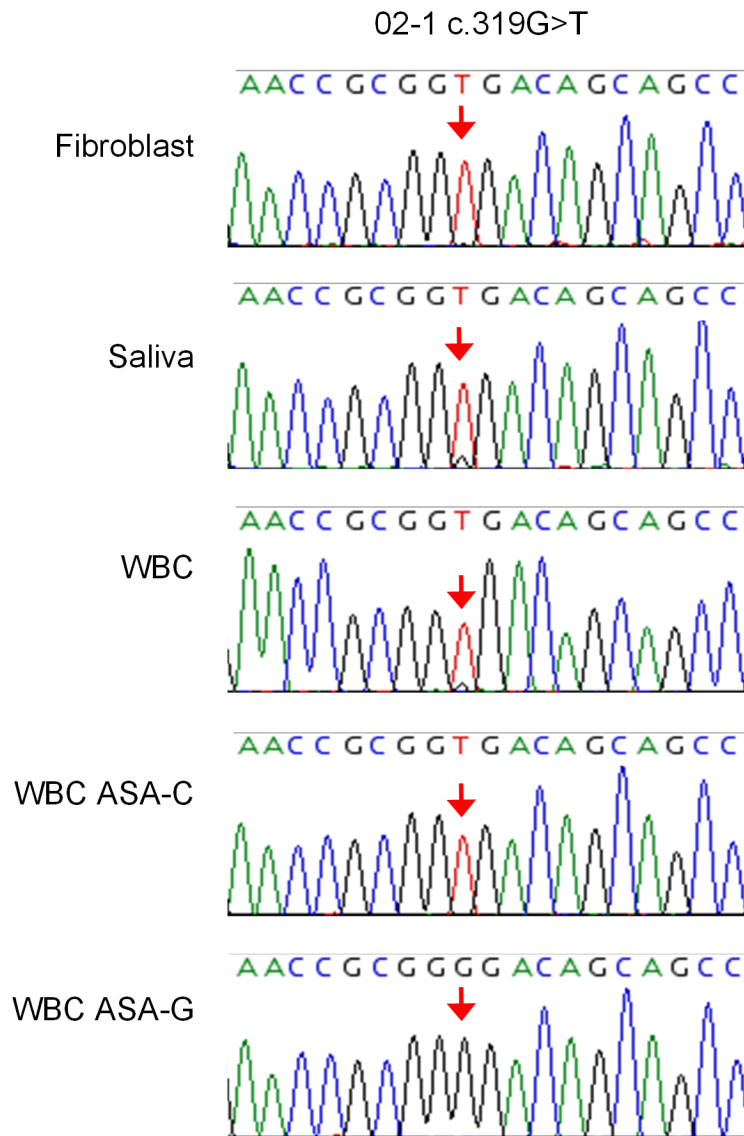

**Figure S2: Allele specific amplification for 02-1.** Sequencing of genomic DNA from multiple tissue types of proband 02-1 shows the small wild-type peak seen in saliva and WBC at position c.319G>T, suggesting allele drop-out. Allele specific amplification against SNP rs117041807 C/G in WBC DNA confirms variant c.319G>T is in fact heterozygous.

**Figure S3**

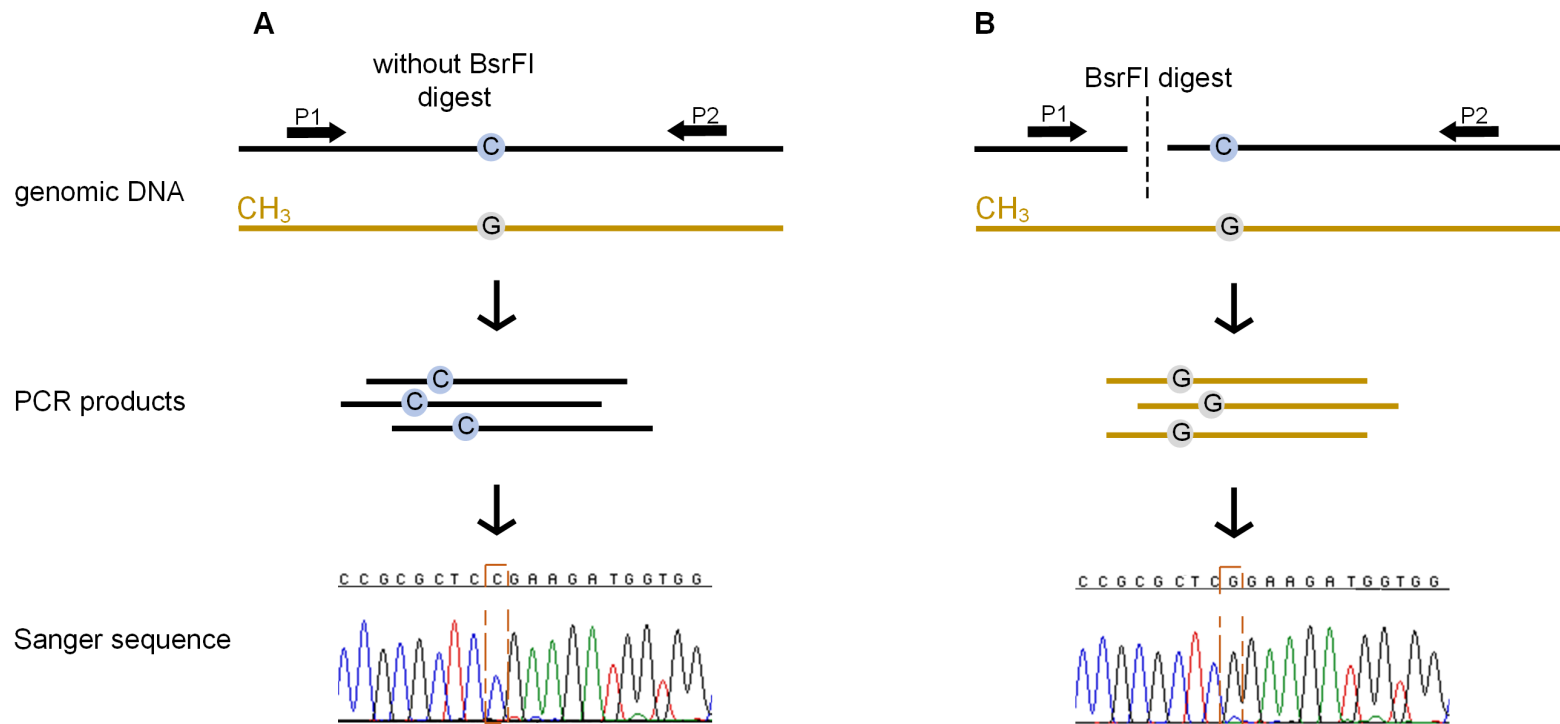

**Figure S3: BsrFI digest allows detection of methylated allele**

Schematic of PCR to amplify *XYLT1* SNP rs117041807 (NM\_022166.3:c.-5C>G) for individual 05-2. (A) PCR of undigested genomic DNA preferentially amplified the unmethylated allele, showing only a single C allele at the site of the SNP. (B) Following digestion with BsrFI, a methylation sensitive restriction enzyme, a BsrFI site between the primers disrupted amplification of the unmethylated allele, allowing detection of the methylated G allele that was previously “hidden”.

**Figure S4**

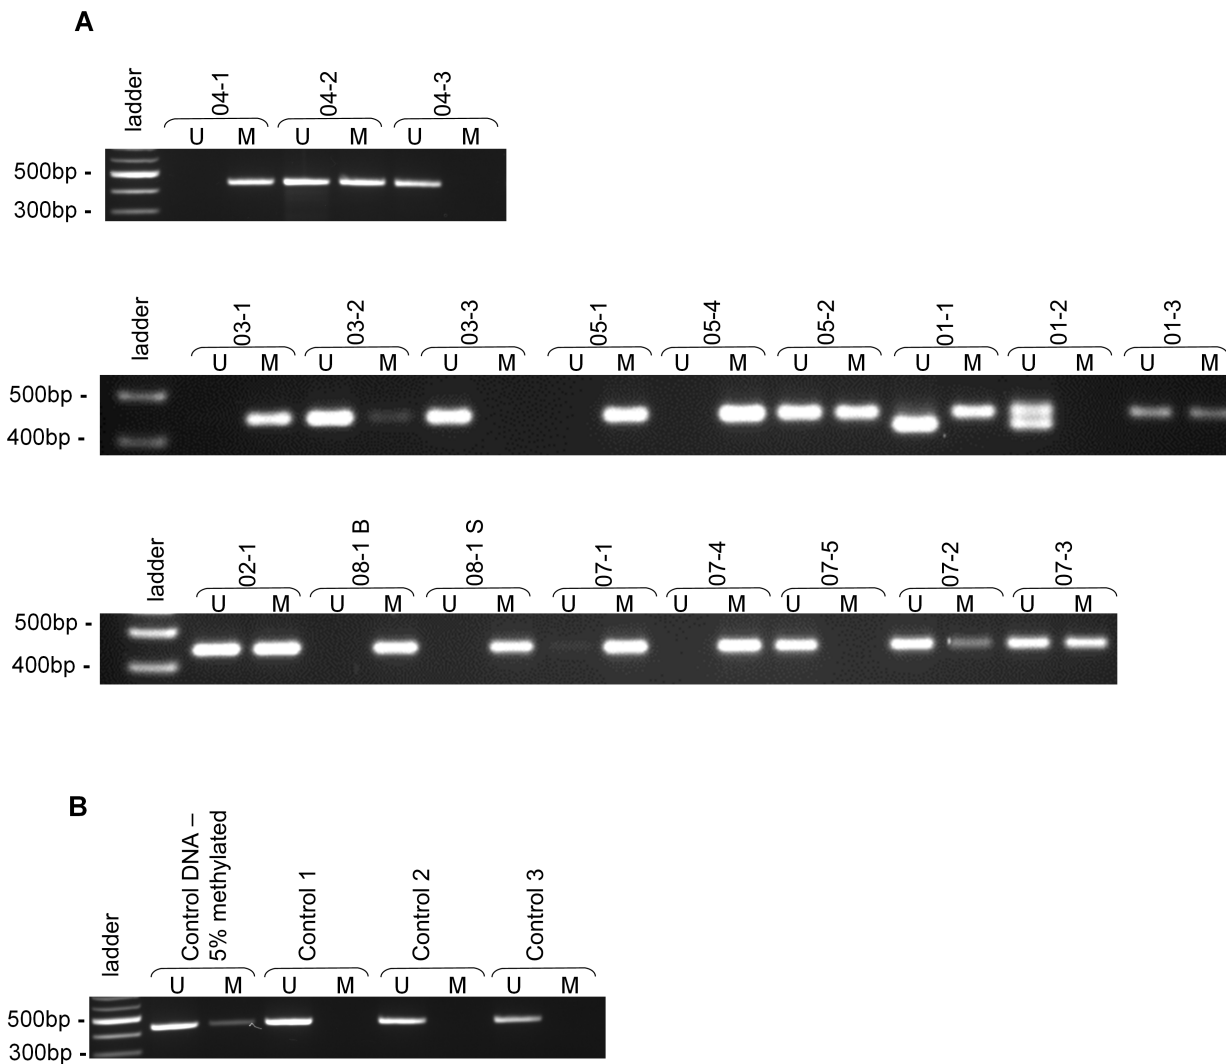

**Figure S4: Representative results of MS-PCR.** MS-PCR was performed on bisulfite treated genomic DNA using primers specific for un methylated (U) or methylated (M) DNA encompassing the majority of exon 1. **(A)** MS-PCR results for members of our BSS cohort. DNA from both whole blood (B) and saliva (S) were tested for proband 08-1. Similar findings were seen in family 06 (not pictured). The smaller size of the un methylated product in individual 01-1 (and 01-2) is due to a 26-bp deletion in exon 1. **(B)** Representative results for unaffected controls, where only un methylated DNA is detected; an internal control of commercially purchased fully methylated genomic DNA diluted to 5% with fully un methylated genomic DNA was included in each experiment.

**Figure S5**

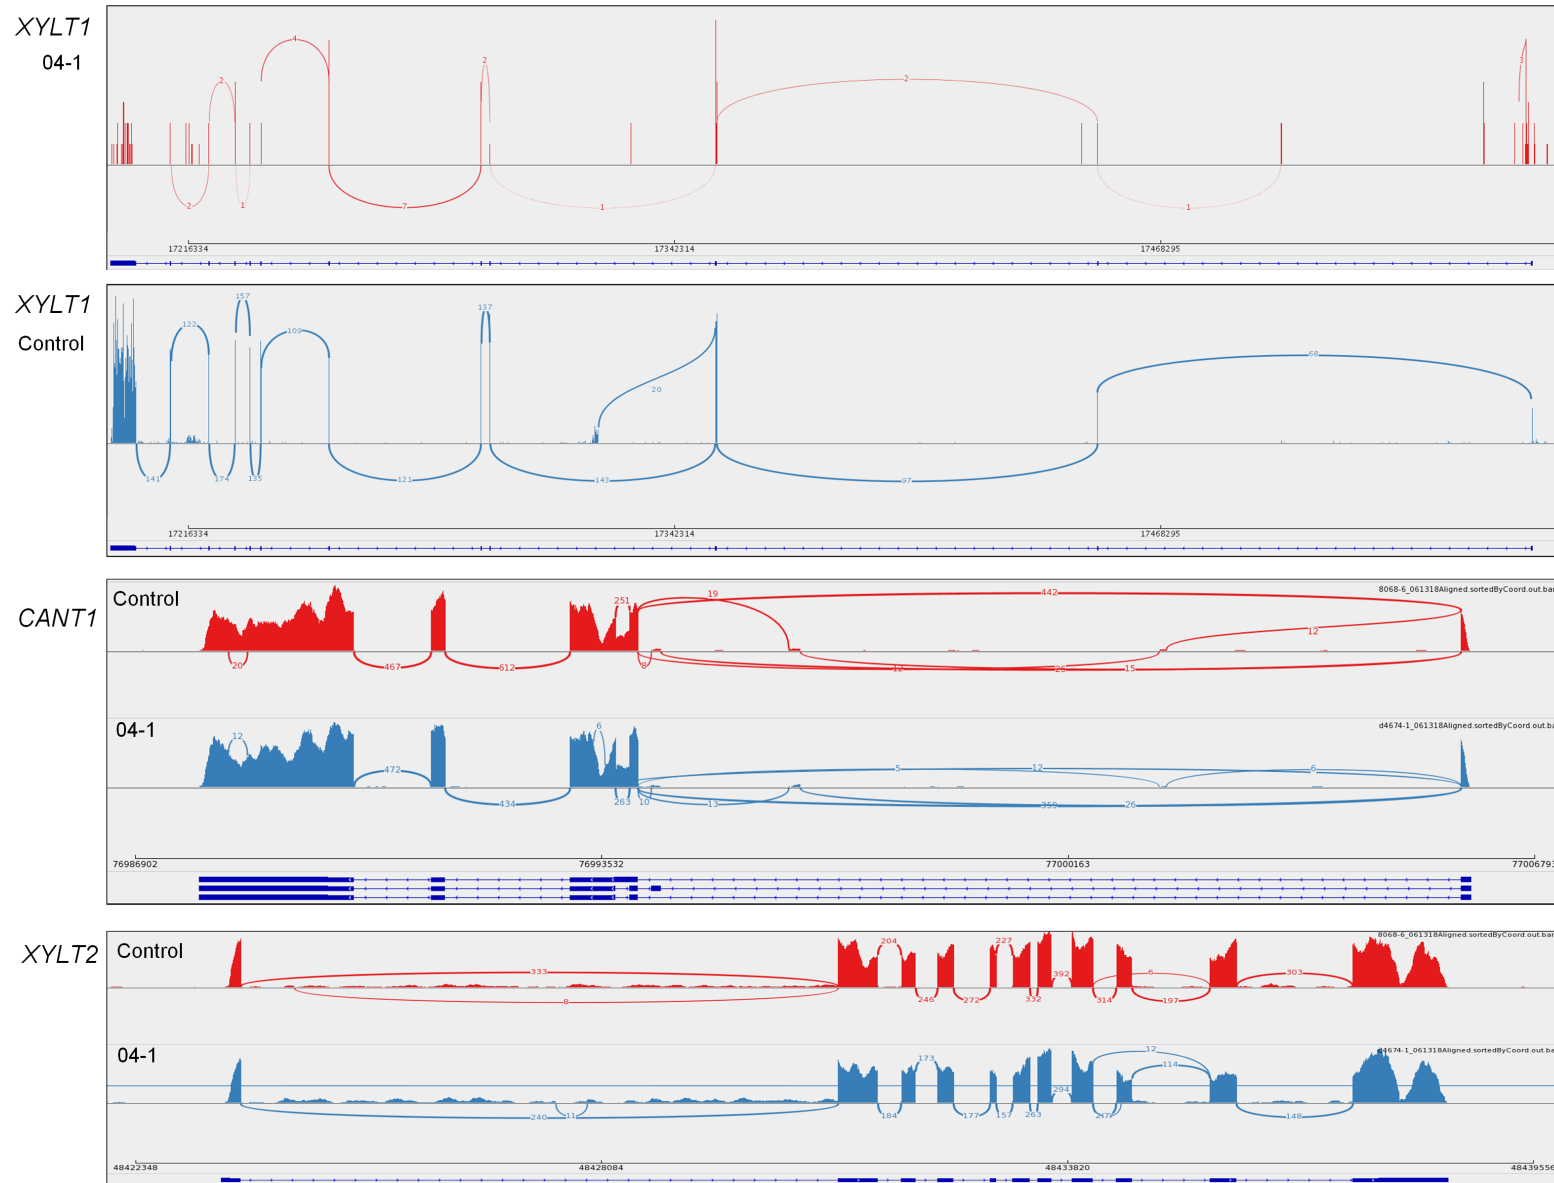

**Figure S5: RNA-seq analysis of *XYLT1* expression in 04-1 fibroblasts.** Sashimi Plot of RNA-seq data. *XYLT1* exon and exon junction coverage is greatly reduced for 04-1 and no full-length transcript is present as exon 1 is not transcribed. In comparison, coverage for *CANT1*, the causative gene for DBQD-I, and *XYLT2* is comparable over exons and exon junctions in both 04-1 and the control.

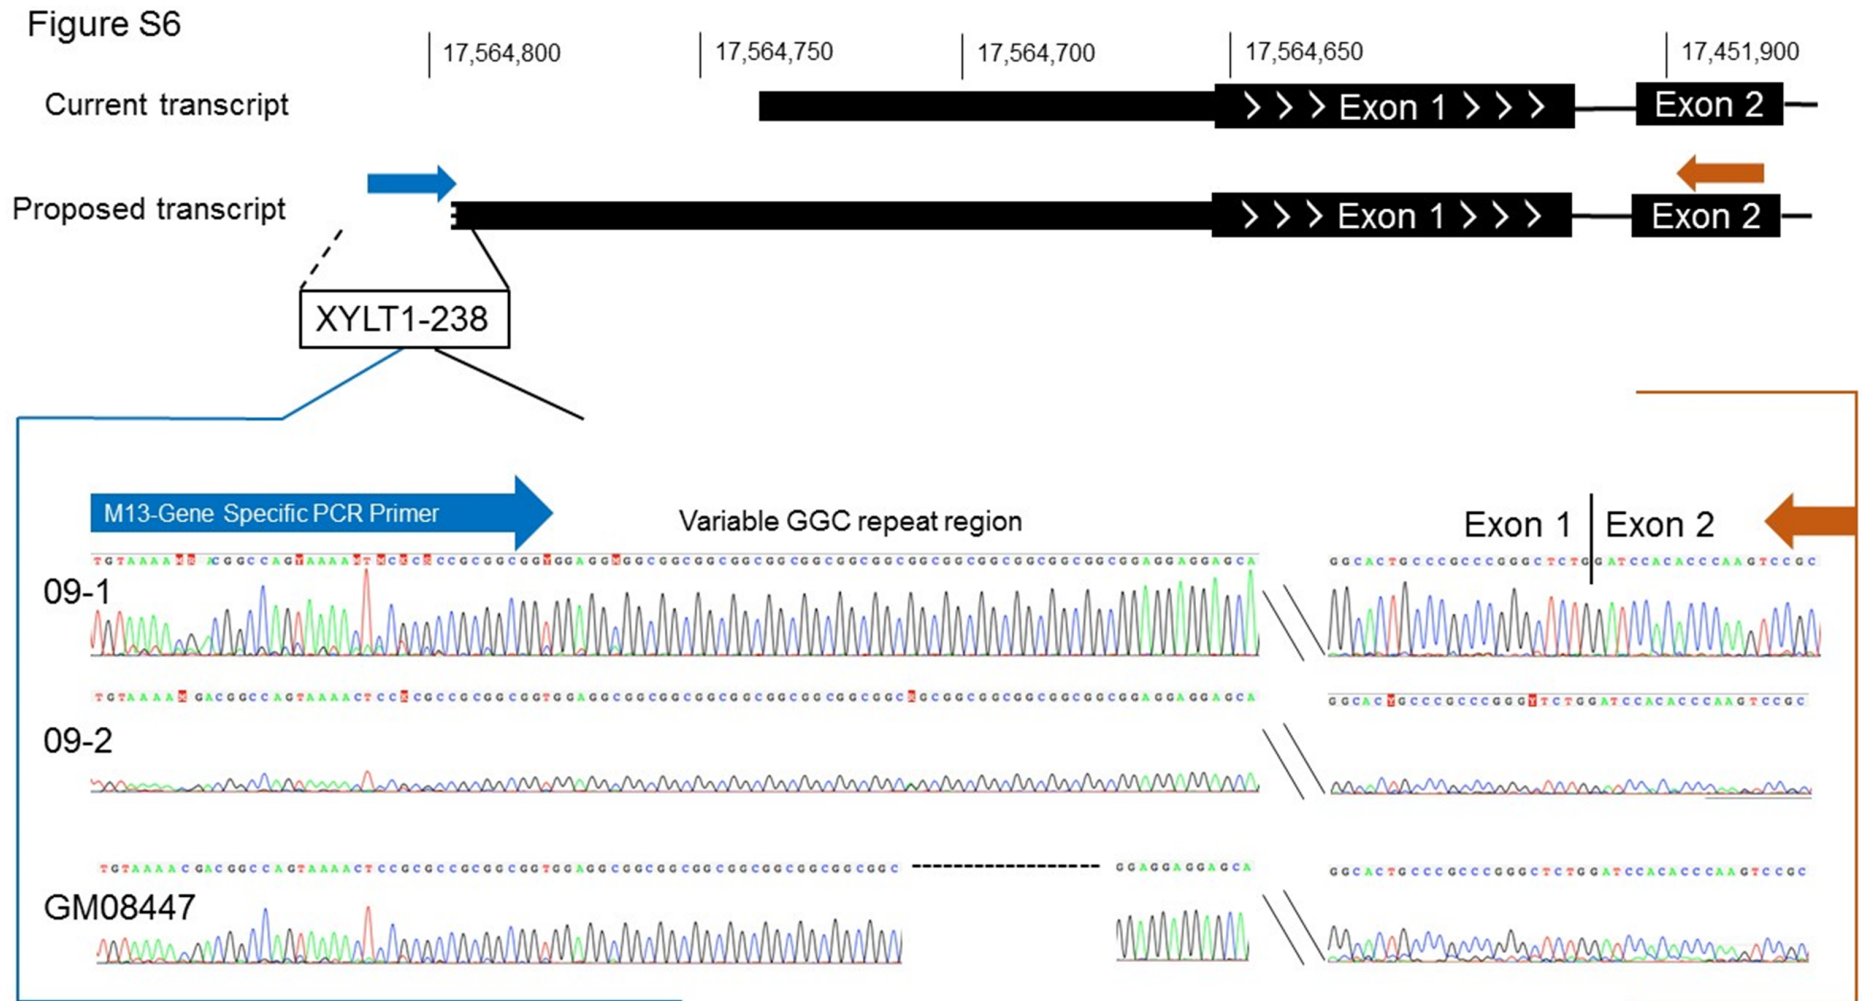

**Figure S6: RT-PCR of mRNA suggests unannotated transcriptional start for *XYLT1*.** RT-PCR was performed using RNA isolated from 09-1 (WBC), 09-2 (WBC) and a control (GM08447 fibroblasts). A primer pair spanning from upstream of the variable GGC repeat region, within XYLT1-238, into exon 2 produced a PCR product, suggesting a transcript start site further upstream than the current annotation. The current transcript and genomic coordinates are notated at the top (GRCh37/hg19, NM\_022166). The proposed transcript is below with the approximate start of XYLT1-238 noted. Electropherograms show the M13 tailed gene specific primer upstream of the variable GGC repeat region and the exon 1/2 boundary, confirming the product is not genomic DNA. Sequencing of genomic DNA from all individuals (not shown) shows the GGC repeat region was within the normal range of 9-20 repeats previously reported.

Figure S7

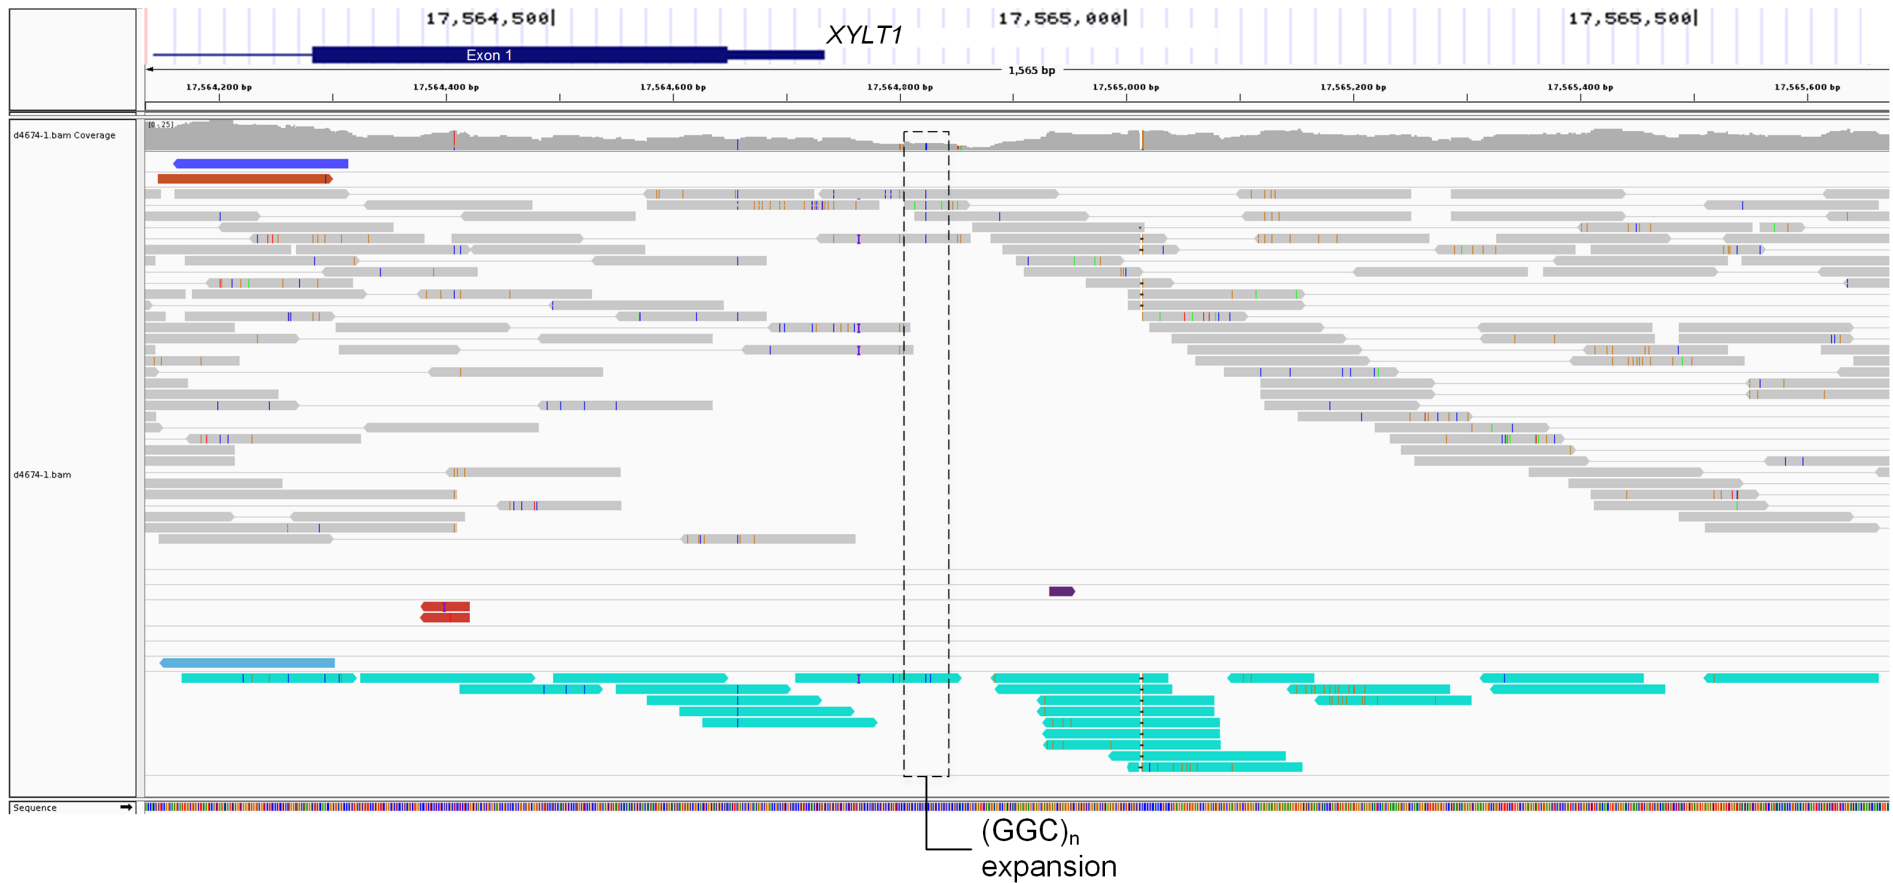

**Figure S7: STretch analysis of genome sequence.** Image from Integrated Genomics Viewer (IGV) for 04-1 genome sequence data of exon 1 and the promoter region of *XYLT1*, including *XYLT1*-238. Connected paired-end reads that align to the reference genome are shown in grey. No read pair spans the area of the expansion site. Reads whose mate maps to a GGC repeat decoy sequence are shown in aquamarine, all of which are displayed. All such reads approach the expansion site, indicating that the missing sequence contains a large GGC repeat.



**Figure S8**

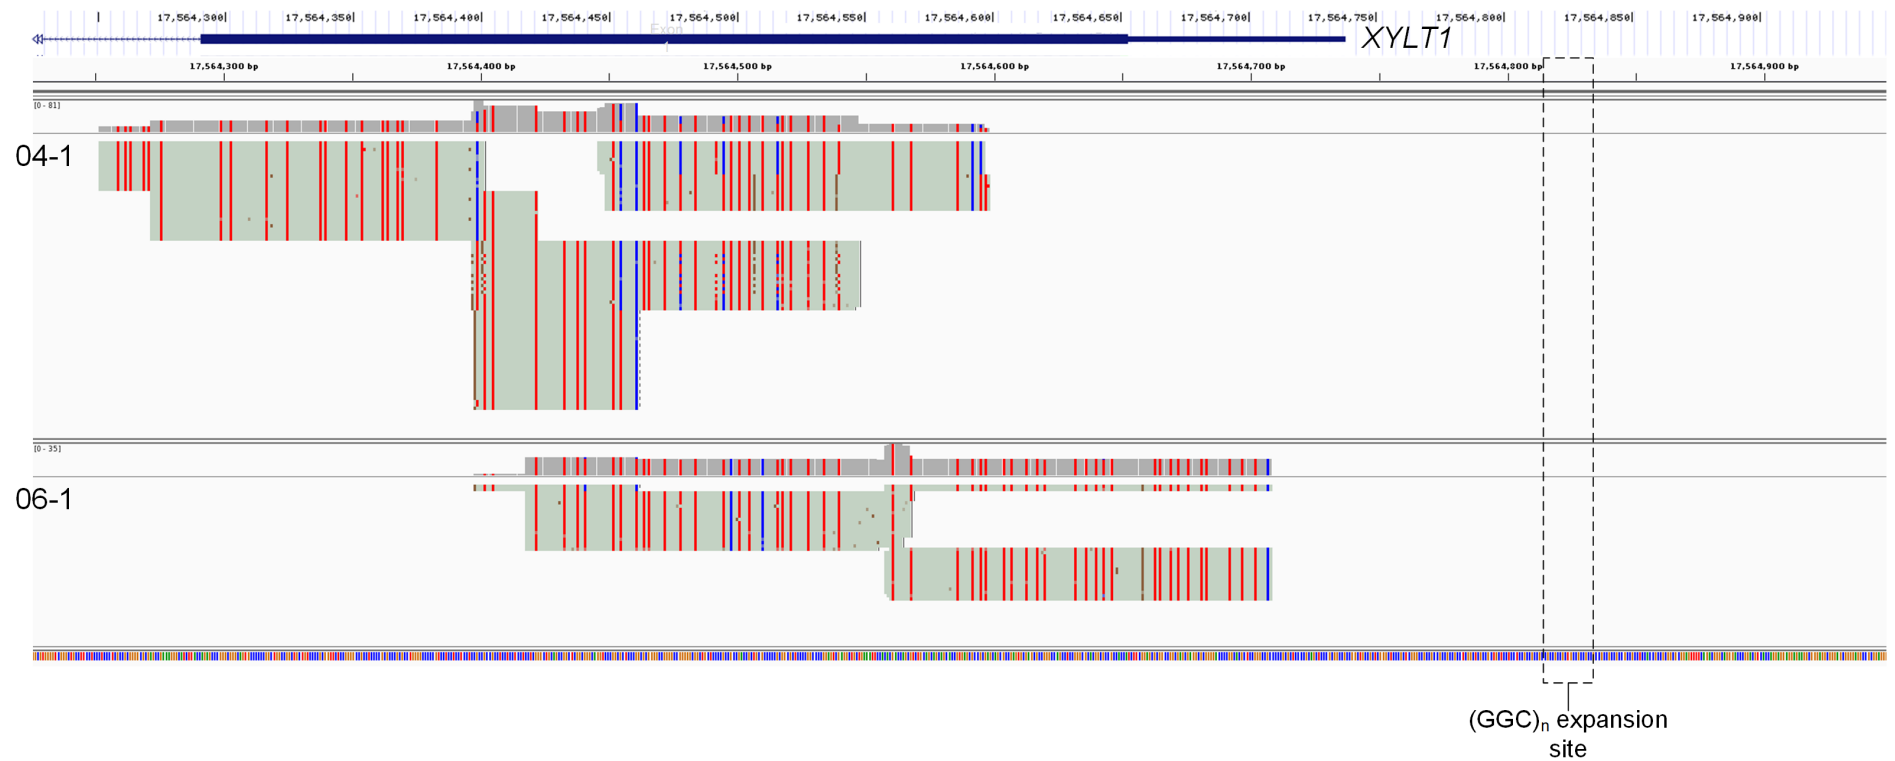

**Figure S8: Whole genome bisulfite sequencing.** Image from Integrated Genomics Viewer (IGV) for 04-1 and 06-1 whole genome bisulfite sequence data of exon 1 and the promoter region of *XYLT1* with tracks colored using 'CG bisulfite mode'. Reads have been collapsed for visualization. Shown in sage are reads that align to the altered reference genome containing *XYLT1*-238. A red nucleotide denotes a nonconverted cytosine (methyl protected), while a blue nucleotide denotes a bisulfite converted cytosine (unmethylated).

**Table S1: Previously reported causal variants for DBQD-II in *XYLT1*.** Reported variants for 16 individuals from 13 families with DBQD-II. All variants are found in or containing *XYLT1*, though only one case has a variant in exon 1, juxtaposed with our cohort. Abbreviations include: Homo, homozygous; Het, heterozygous; NR, not reported; Consang, consanguineous.

|    | Ethnicity | Consang | Sex    | cDNA               | Protein              | Location        | Status | Reference                            |
|----|-----------|---------|--------|--------------------|----------------------|-----------------|--------|--------------------------------------|
| 1  | Tunisian  | +       | Female | c.1792C>T          | p.(Arg598Cys)        | Exon 9          | Homo   | Bui et al., 2014 AJHG                |
|    |           |         | Male   |                    |                      |                 |        |                                      |
| 2  | Mauritian | +       | Female | c.439C>T           | p.(Arg147Ter)        | Exon 3          | Homo   | Bui et al., 2014 AJHG                |
| 3  | Belgian   | +       | Male   | c.276dupG          | p.(Pro93AlafsTer69)  | Exon 1          | Homo   | Bui et al., 2014 AJHG                |
| 4  | Turkish   | +       | NR     | c.1588-3C>T        | Unknown              | Intron 7        | Homo   | Bui et al., 2014 AJHG                |
| 5  | Turkish   | +       | NR     | c.1290-2A>C        | Unknown              | Intron 5        | Homo   | Bui et al., 2014 AJHG                |
| 6  | Turkish   | +       | NR     | c.1290-2A>C        | Unknown              | Intron 5        | Homo   | Bui et al., 2014 AJHG                |
| 7  | Turkish   | +       | Female | c.1441C>T          | p.(Arg481Trp)        | Exon 7          | Homo   | Schreml et al., 2014 Hum Genet       |
|    |           |         | Male   |                    |                      |                 |        |                                      |
| 8  | Polish    | -       | Male   | c.595C>T           | p.(Gln199Ter)        | Exon 3          | Het    | Jamsheer et al., 2016 J Hum Genet    |
|    |           |         |        | c.1651C>T          | p.(Arg551Cys)        | Exon 8          | Het    |                                      |
| 9  | Brazilian | +       | Female | c.1651C>T          | p.(Arg551Cys)        | Exon 8          | Homo   | Silveira et al., 2016 AJMG           |
| 10 | Turkish   | +       | Female | c.1792delC         | p.(Arg598AlafsTer7)  | Exon 9          | Homo   | Guo et al., 2017 J Hum Genet         |
|    |           |         | Female |                    |                      |                 |        |                                      |
| 11 | Turkish   | -       | Female | c.1290-2A>C        | Unknown              | Intron 5        | Homo   | Guo et al., 2017 J Hum Genet         |
| 12 | Emirati   | +       | Male   | c.2169dupA         | p.(Val724SerfsTer10) | Exon 10         | Homo   | Al-Jezawi et al., 2017 AJMG          |
| 13 | Dutch     | -       | Male   | 16p13 del (3.3 Mb) | Absent               | Whole gene      | Het    | Van Koningsbruggen et al., 2016 AJMG |
|    |           |         |        | c.1588-10_1595del  | Unknown              | Intron 7-Exon 8 | Het    |                                      |

**Table S2: Southern blot probe generation primers.** Primer sequences used to create the probe for Southern blot analysis, located in *XYLT1* Intron 1.

|                | <b>Forward sequence 5' – 3'</b> | <b>Reverse sequence 5' – 3'</b> | <b>Genomic coordinates</b>     | <b>Product size</b> |
|----------------|---------------------------------|---------------------------------|--------------------------------|---------------------|
| Southern probe | GGGAGACGGCAAGGTTAGAG            | CTCTGCAAGCCTACCGACTC            | 16: 17,563,659 -<br>17,564,191 | 533bp               |

**Table S3: Methylation specific primers for *XYLT1*.** Primer sequences used to perform Methylation-specific PCR. Primer sequences for both a region upstream (5') of the expansion and exon 2 are provided as an additional reference (data not shown).

| Target                     | Methyl state | Forward sequence 5' – 3'                    | Reverse sequence 5' – 3'                  | Genomic coordinates           | Product size |
|----------------------------|--------------|---------------------------------------------|-------------------------------------------|-------------------------------|--------------|
| Exon 1                     | Unmethylated | TGTTGTTGTTGTAGATGTTGGTT                     | CCACCCAACCTCCCAAACAAAAACAATATAA<br>AATCA  | 16:17,564,140 –<br>17,564,583 | 444bp        |
| Exon 1                     | Methylated   | TGTTGTTGTTGTAGACGTTGGTC                     | CCACCCGACTCCCGAAACAAAAACGATATA<br>AAATCG  | 16:17,564,140 –<br>17,564,583 | 444bp        |
| Upstream of expansion site | Unmethylated | TTGTGAAGGTTGAGTAATTTTATGGGTTTTTTTT<br>TTGTT | CATAAAAAAACTCCTAACCCCAAATTCACA            | 16:17,565,129 –<br>17,565,486 | 358bp        |
| Upstream of expansion site | Methylated   | TTGCGAAGGTTGAGTAATTTTACGGGTTTTTTTT<br>TTGTC | CGTAAAAAACTCCTAACCCCGAAATTCGCG            | 16:17,565,129 –<br>17,565,486 | 358bp        |
| Exon 2                     | Unmethylated | TTATGTTATTGTTTTTAGTTTGGGTAATAAAGT           | TCTCCACAAATAAAAAAACACCAAACACCTAA<br>ATACT | 16:17,451,624 –<br>17,452,051 | 428bp        |
| Exon 2                     | Methylated   | TTATGTTATTGTTTTTAGTTTGGGTAATAAAGC           | TCCCCACAAATAAAAAAACACCAAACACCTA<br>AATACC | 16:17,451,624 –<br>17,452,051 | 428bp        |

**Table S4: BSS Cohort Variants.** Variant information corresponds to Homo sapiens xylosyltransferase I (XYLT1-001), GRCh37/hg19, NM\_022166.3; CH3, methylated allele

| Sample ID | Variant 1                          | Variant 2                      | Relationship | Status     |
|-----------|------------------------------------|--------------------------------|--------------|------------|
| 04-1      | 16p13 del                          | CH3                            | proband      | affected   |
| 04-2      | -                                  | CH3                            | mother       | unaffected |
| 04-3      | -                                  | -                              | father       | unaffected |
| 06-1      | 16p13 del                          | CH3                            | proband      | affected   |
| 06-2      | -                                  | CH3                            | mother       | unaffected |
| 06-3      | 16p13 del                          | -                              | father       | unaffected |
| 06-4      | 16p13 del                          | -                              | sibling      | unaffected |
| 06-5      | 16p13 del                          | -                              | sibling      | unaffected |
| 03-1      | 16p13 del                          | CH3                            | proband      | affected   |
| 03-2      | -                                  | CH3                            | mother       | unaffected |
| 03-3      | 16p13 del                          | -                              | father       | unaffected |
| 02-1      | c.319G>T,<br>p.Gly107Ter           | CH3                            | proband      | affected   |
| 08-1      | CH3                                | CH3                            | proband      | affected   |
| 01-1      | c.281_306del,<br>p.Gln94ArgfsTer59 | CH3                            | proband      | affected   |
| 01-2      | c.281_306del,<br>p.Gln94ArgfsTer59 | -                              | mother       | unaffected |
| 01-3      | -                                  | CH3                            | father       | unaffected |
| 05-1      | 16p13 del                          | CH3                            | proband      | affected   |
| 05-2      | -                                  | CH3                            | mother       | unaffected |
| 05-4      | 16p13 del                          | CH3                            | sibling      | affected   |
| 07-1      | CH3                                | CH3                            | proband      | affected   |
| 07-2      | -                                  | CH3                            | mother       | unaffected |
| 07-3      | -                                  | CH3                            | father       | unaffected |
| 07-4      | CH3                                | CH3                            | sibling      | affected   |
| 07-5      | -                                  | -                              | sibling      | unaffected |
| 09-1      | c.1290-1G>A,<br>r.1375_1455del     | c.1290-1G>A,<br>r.1375_1455del | proband      | affected   |
| 09-2      | c.1290-1G>A,                       | -                              | mother       | unaffected |

|      |                                      |                                      |                          |            |
|------|--------------------------------------|--------------------------------------|--------------------------|------------|
|      | r.1375_1455del                       |                                      |                          |            |
| 09-3 | c.1290-1G>A,<br>r.1375_1455del       | -                                    | father                   | unaffected |
| 09-4 | c.1290-1G>A,<br>r.1375_1455del       | -                                    | sibling                  | unaffected |
| 09-5 | -                                    | -                                    | maternal<br>half-sibling | unaffected |
| 10-1 | c.1730_1733dup,<br>p.Asp578GlufsTer2 | c.1730_1733dup,<br>p.Asp578GlufsTer2 | proband                  | affected   |

**Table S5: RT-PCR primers used to examine the transcription start site of *XYLT1*.** Primer sequences used in preliminary experiments to examine the true transcriptional start of *XYLT1*. Internal sequencing primers were used due to difficulty sequencing through the region.

| <b>Primer Name</b>                  | <b>Sequence 5' – 3'</b>              |
|-------------------------------------|--------------------------------------|
| M13 gene-specific primer; Forward   | TGTAACGACGGCCAGTAAACTCCGCGCCGCGGCGGT |
| XYLT1-Exon 2; Reverse               | AGTCTCCAGGGTGATGAGCGGA               |
|                                     |                                      |
| Internal seq; XYLT1-Exon 1; Reverse | TTCCACACGACCAGCGTCTGC                |
| Internal seq; XYLT1-Exon 1; Forward | AGCGCGGGGGCGGCCCGGAGCGT              |
| Internal seq; XYLT1-Exon 1; Reverse | CTGCAGCCGGCTCGGCGGGCAGGTC            |
